# Supplementary material for: Association between parity and markers of inflammation: The multi-ethnic study of atherosclerosis
Source: PubMed Central journal article supplement (PMC9515387; doi:10.3389/fcvm.2022.922367), 2022-09-14
Supplement: Image_1.pdf [file Image_1.pdf]

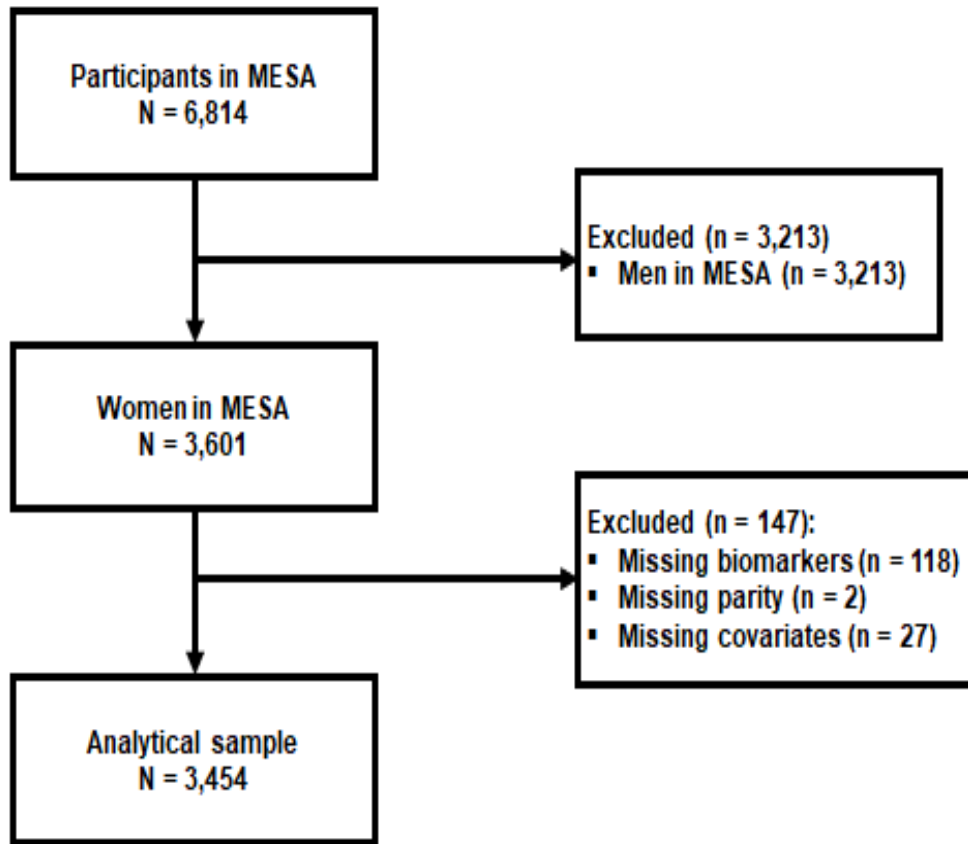

**Figure S1. Flowchart of study participants**

To preserve sample size, we did not exclude missing observations for pack-years of smoking,  $n = 32$  and hormone therapy,  $n = 339$ .
